# Supplementary material for: A scalable and cGMP-compatible autologous organotypic cell therapy for Dystrophic Epidermolysis Bullosa
Source: PubMed Central journal article supplement (PMC11239819; doi:10.1038/s41467-024-49400-z), 2024-07-11
Supplement: 41467_2024_49400_MOESM1_ESM.pdf [file 41467_2024_49400_MOESM1_ESM.pdf]

1 SUPPLEMENTARY INFORMATION

2

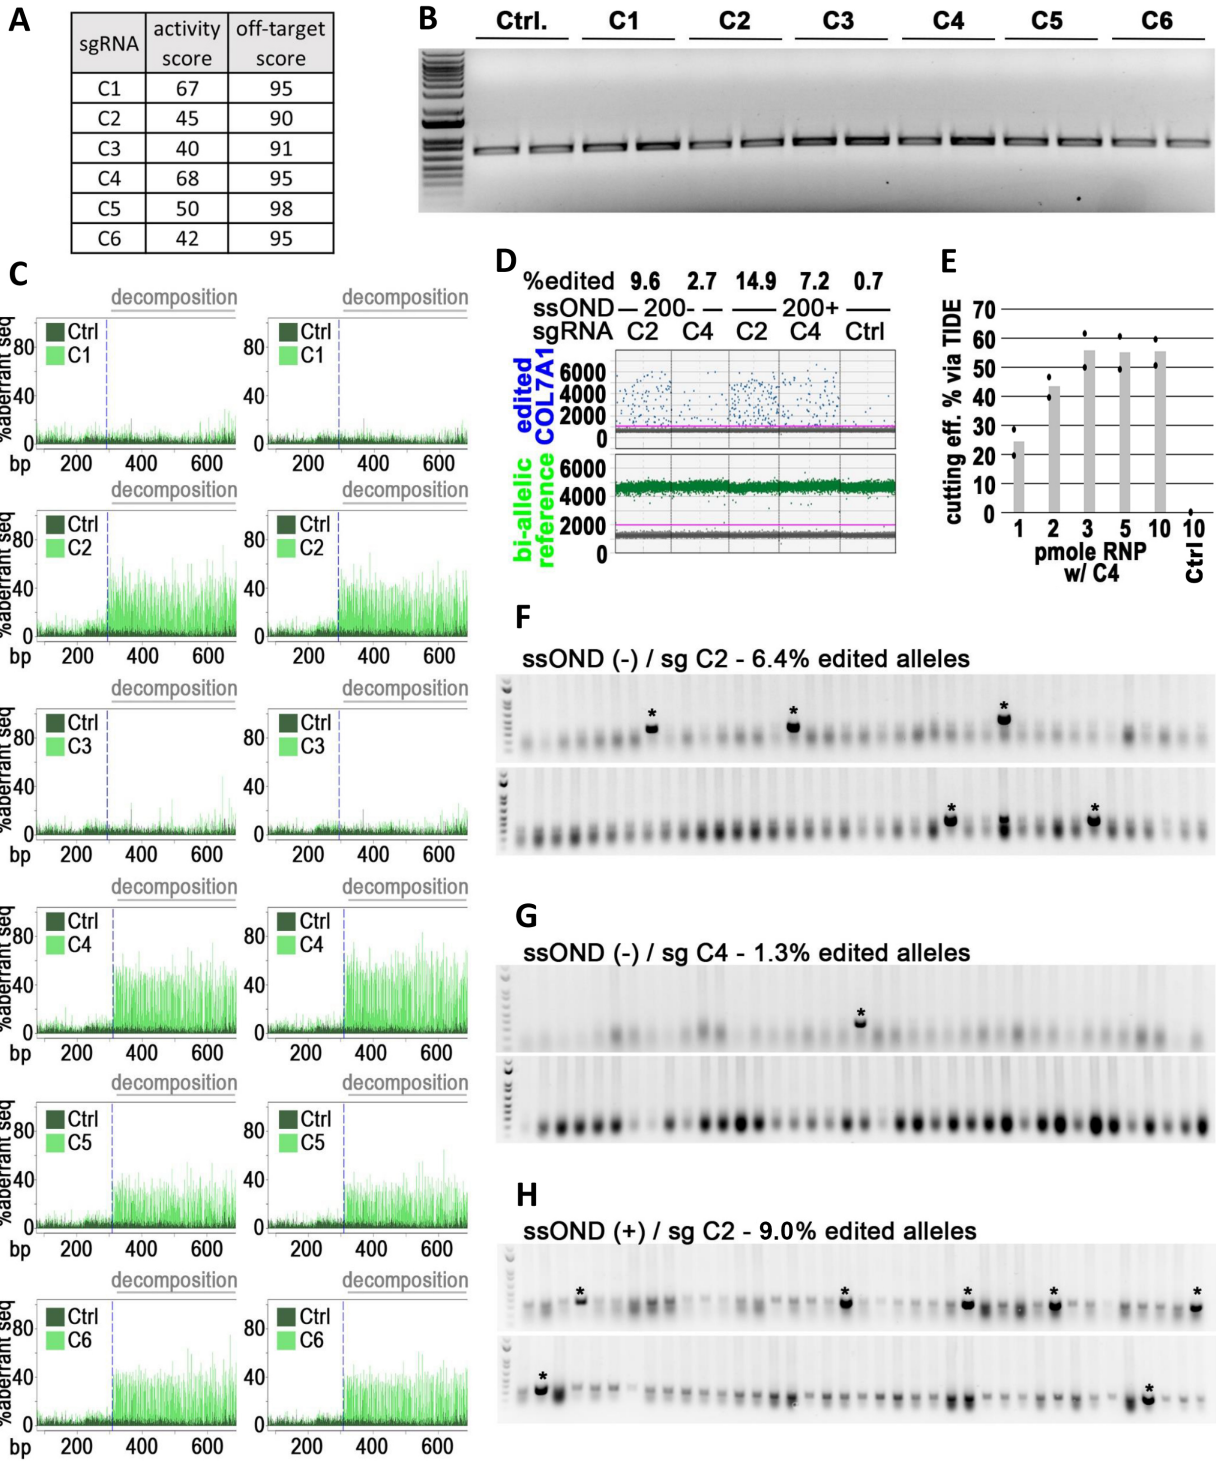

3

4 **Supplementary Figure 1: Optimized editing of the Colorado mt (7485+5 G>A).** (A) *in silico*  
5 predicted efficiency (middle column) and specificity (right column) score of the 6 tested sgRNAs  
6 (left column) used to mediate CAS9-cutting of the pathogenic Colorado allele. (B) Agarose gel  
7 visualizing PCR amplicons of a 731bp sequence surrounding the *COL7A1* target locus from  
8 homozygous CO2 patient fibroblasts transfected with RNPs containing CAS9 and indicated  
9 sgRNAs (Ctrl. omitted sgRNA). Two biological replicates are shown. A DNA size reference was  
10 run in most left lane (100bp-15000bp range shown). (C) TIDE traces of PCR amplicons shown in  
11 Supplementary Figure 1B. (D) *COL7A1* editing efficiencies as measured by ddPCR in DEB125  
12 primary patient fibroblasts (het. Colorado mt) after transfection with ssODNs and sgRNA/CAS9-  
13 containing RNPs as indicated. A bi-allelic locus (green) is used as a reference for calculating  
14 *COL7A1* editing (blue) efficiencies. Ctrl omitted sgRNAs. (E) InDel formation in CO2 fibroblasts  
15 after transfection with indicated amounts of sgRNA C4-containing RNPs as measured by TIDE  
16 (n=2 biological replicates; mean is shown with individual data points overlaid as scatter plot;  
17 Ctrl. omitted sgRNA). (F-H) Agarose gels visualizing 78 *E. coli* colony-PCRs to detect edited  
18 TOPO-cloned *COL7A1* alleles from CO2 fibroblasts transfected with ssODNs and RNPs  
19 containing sgRNAs as indicated. A primer specific for silent mutations (see Figure 1B) only  
20 amplifies PCR products of alleles with integration of donor sequences (asterisks). DNA size  
21 references were run in most left lanes (100bp-2000bp range shown).  
22

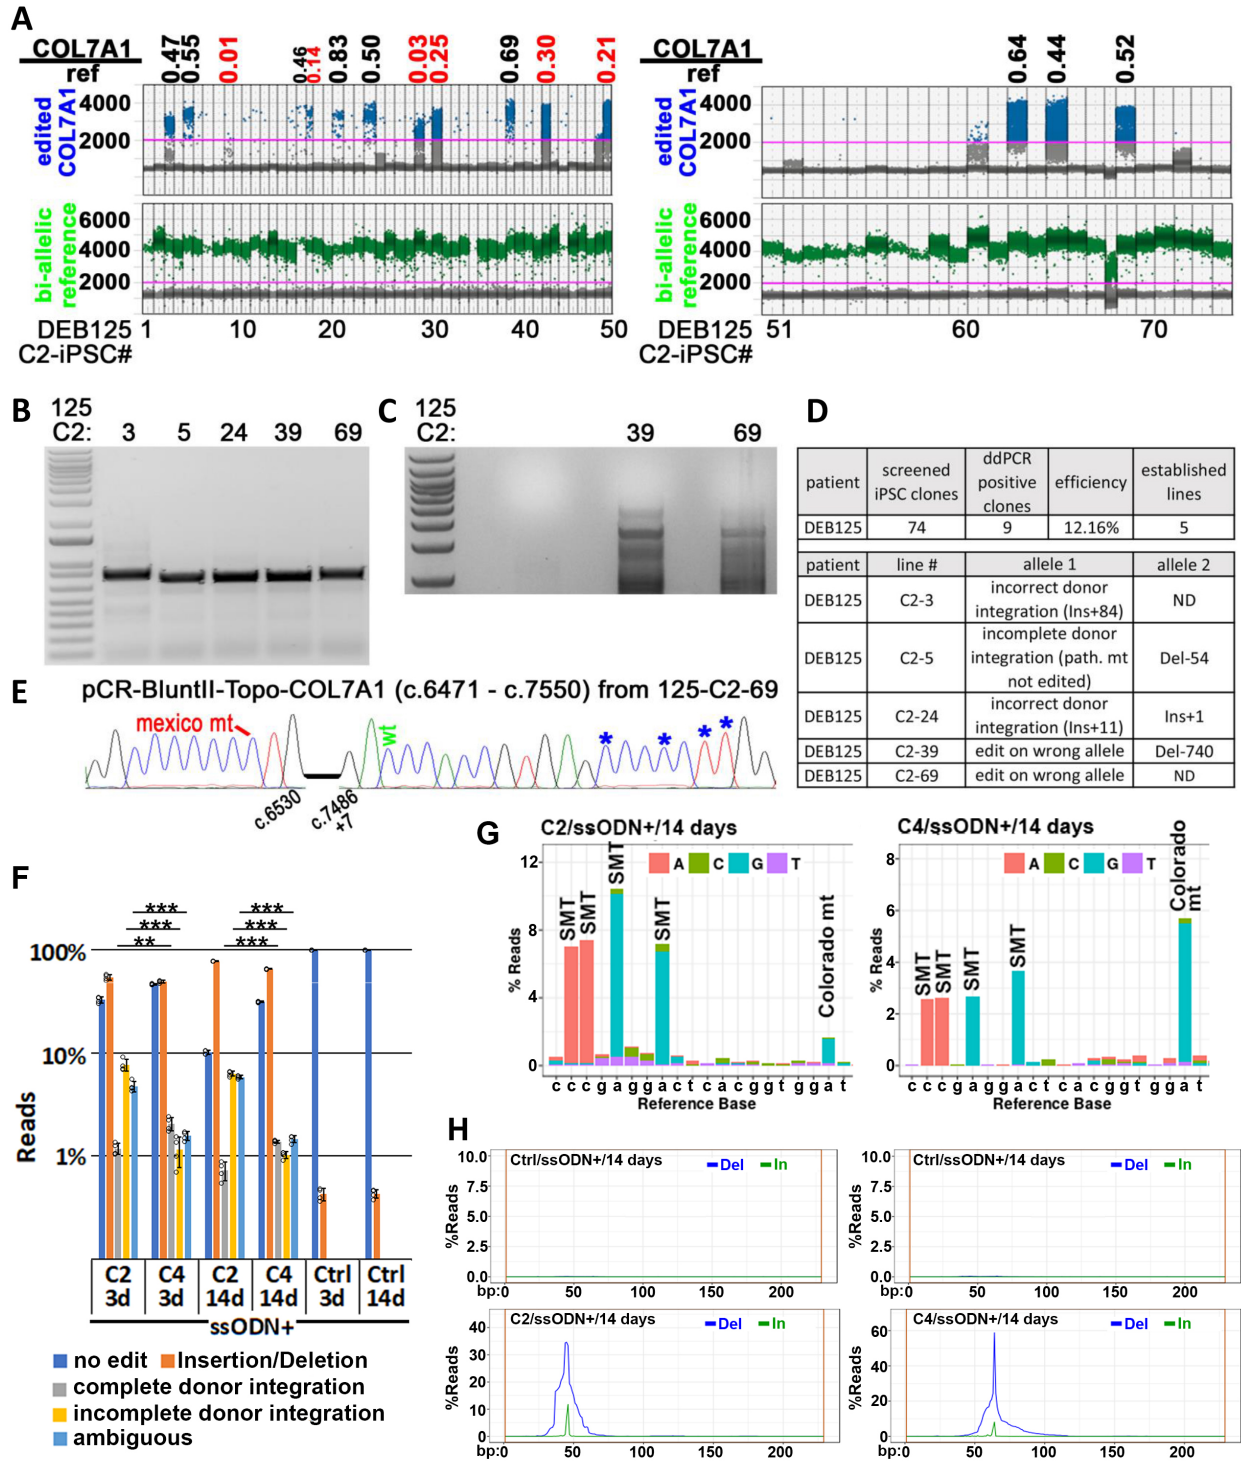

23

24 **Supplementary Figure 2: COL7A1 repair with the less specific sgRNA C2. (A)** ddPCR

25 screening of 74 iPSC lines derived from DEB125 (sgRNA C2/ssODN+) identified 9 candidates.

26 Ratios of signals detecting edited COL7A1 alleles (blue) and a bi-allelic reference locus (green)

27 identify mono-allelic (0.5 +/-0.19) or bi-allelic (1.0 +/-0.19) editing events (black values; red values  
28 below/above cut off). **(B-C)** 5 of these candidate iPS cell lines were analyzed via agarose gels  
29 visualizing PCR amplicons of a 731bp (B) and 4560bp (C) sequence surrounding the edited  
30 *COL7A1* locus. (DNA size references in most left lanes). **(D-E)** Cloning and Sanger sequencing  
31 revealed correctly edited *COL7A1* in 2 of 5 candidates (D; top: summary of screen). *COL7A1*  
32 repair in lines 125-C2-39 and 125-C2-69 occurred, however, on the wrong allele carrying the  
33 second heterozygous compound mutation of this patient (E; 'Mexico mt', 6527dupC). This agrees  
34 with the low specificity of sgRNA C2. We note that sgRNA C2 is capable of targeting the disease  
35 allele as we have successfully used it to derive repaired cell lines from fibroblasts of homozygous  
36 patient CO2 (Figure 4A). **(F)** Analysis of next generation sequencing (>700k reads per technical  
37 replicate; n=4; mean and SD are shown) of PCR amplicons encompassing the Colorado locus  
38 from CO2 primary patient fibroblasts. Employed sgRNAs complexed with CAS9, ssODNs(+), and  
39 timepoints (d: days) after transfection are indicated. Compared to sgRNA C2, sgRNA C4-edited  
40 populations exhibit significantly (t test;  $p < 0.05^*$ ,  $p < 0.01^{**}$ ,  $p < 0.001^{***}$ ) more alleles with all  
41 designed edits encoded by ssODNs (see Figure 1B) incorporated (i.e. complete donor  
42 integration). Conversely, sgRNA C2-edited populations exhibit significantly more alleles on which  
43 only some, but not all of the designed ssODN-edits were incorporated, when compared to sgRNA  
44 C4 (i.e. incomplete and ambiguous donor integration); log<sub>10</sub> scale. **(G)** Biological replicate of the  
45 14d time point shown in (F) analyzed at single base pair resolution confirms less efficient repair  
46 of the Colorado locus in sgRNA C2 edited fibroblasts compared to sgRNA C4 edited populations  
47 (SMT: silent mutation). **(H)** Spectrum of insertions (In; green) and deletions (Del; blue) detected  
48 by next generation sequencing of PCR amplicons as in (G; 14d timepoint). sgRNAs as indicated  
49 and omitted in controls (Ctrl).

50

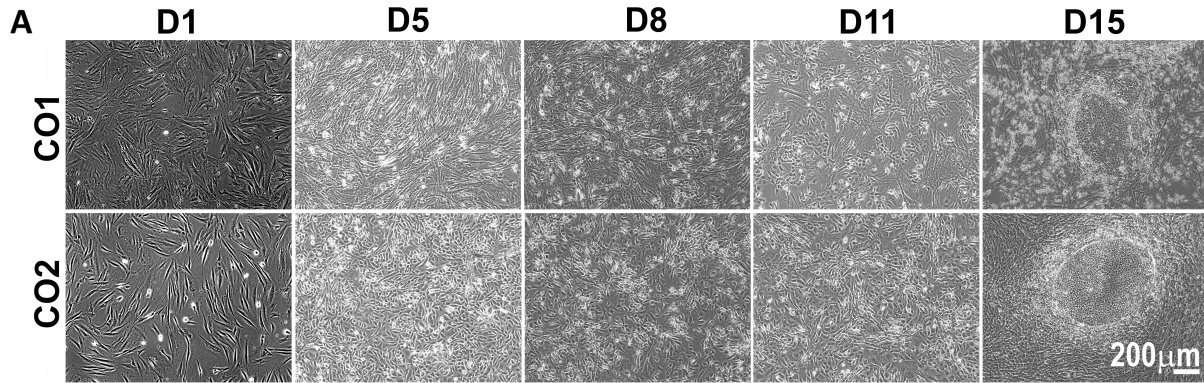

**B** removal of fibroblasts

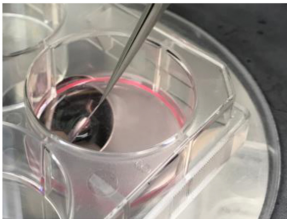

**C**

iPSC colonies after removal of fibroblasts

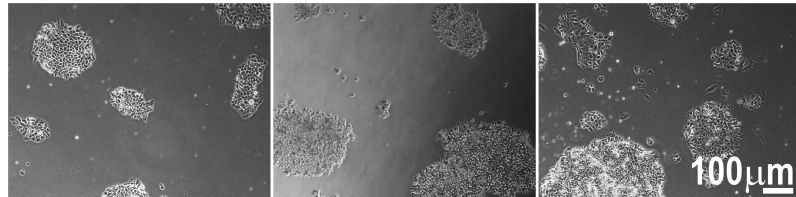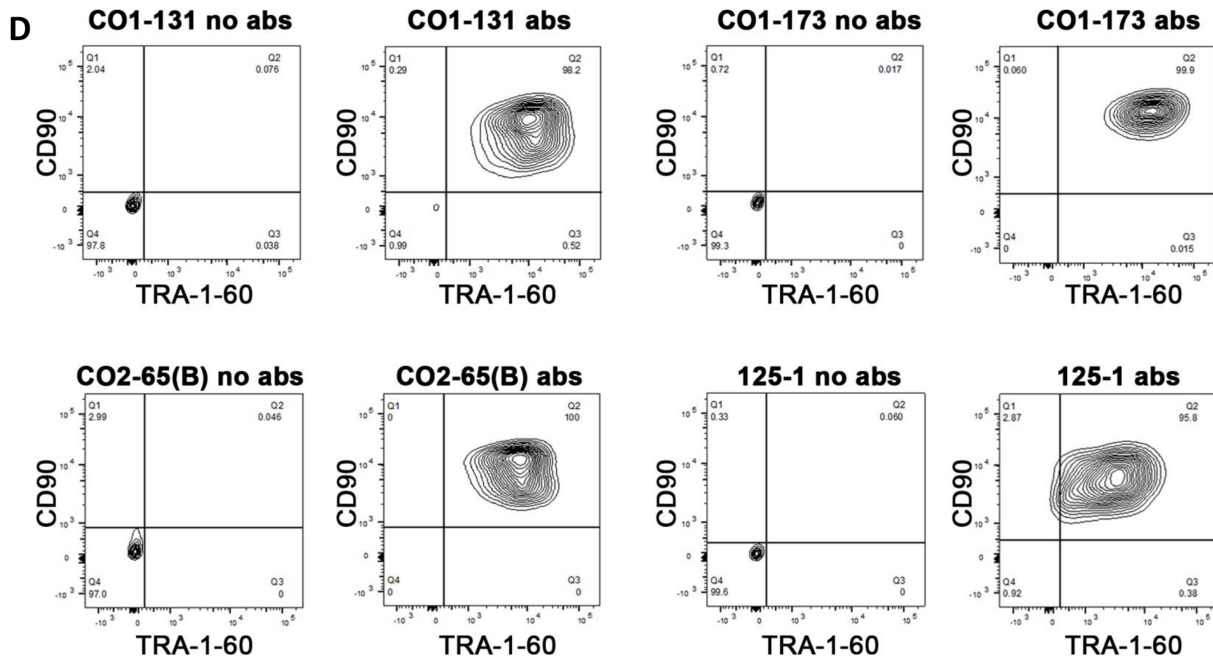

51

52 **Supplementary Figure 3: Efficient derivation of iPSC cells from primary RDEB patient**

53 **fibroblasts. (A)** Phase contrast microscopy pictures of cell cultures during single-step

54 editing/reprogramming from time points (D: day) and patients as indicated. iPSC cell colonies

55 emerge around D11-14 (line dependent). Scale as indicated. **(B)** Non-reprogrammed cells grow  
56 to confluency, adhere together, overlay iPS cell colonies and can be mechanically removed. **(C)**  
57 iPS cell colonies remain after removal of non-reprogrammed cells. Scale as indicated. **(D)** Flow  
58 cytometry analysis of single-step edited/reprogrammed iPS cell lines with and without labeling  
59 (antibodies; abs) of the pluripotency surface marker TRA-1-60 as indicated.  
60

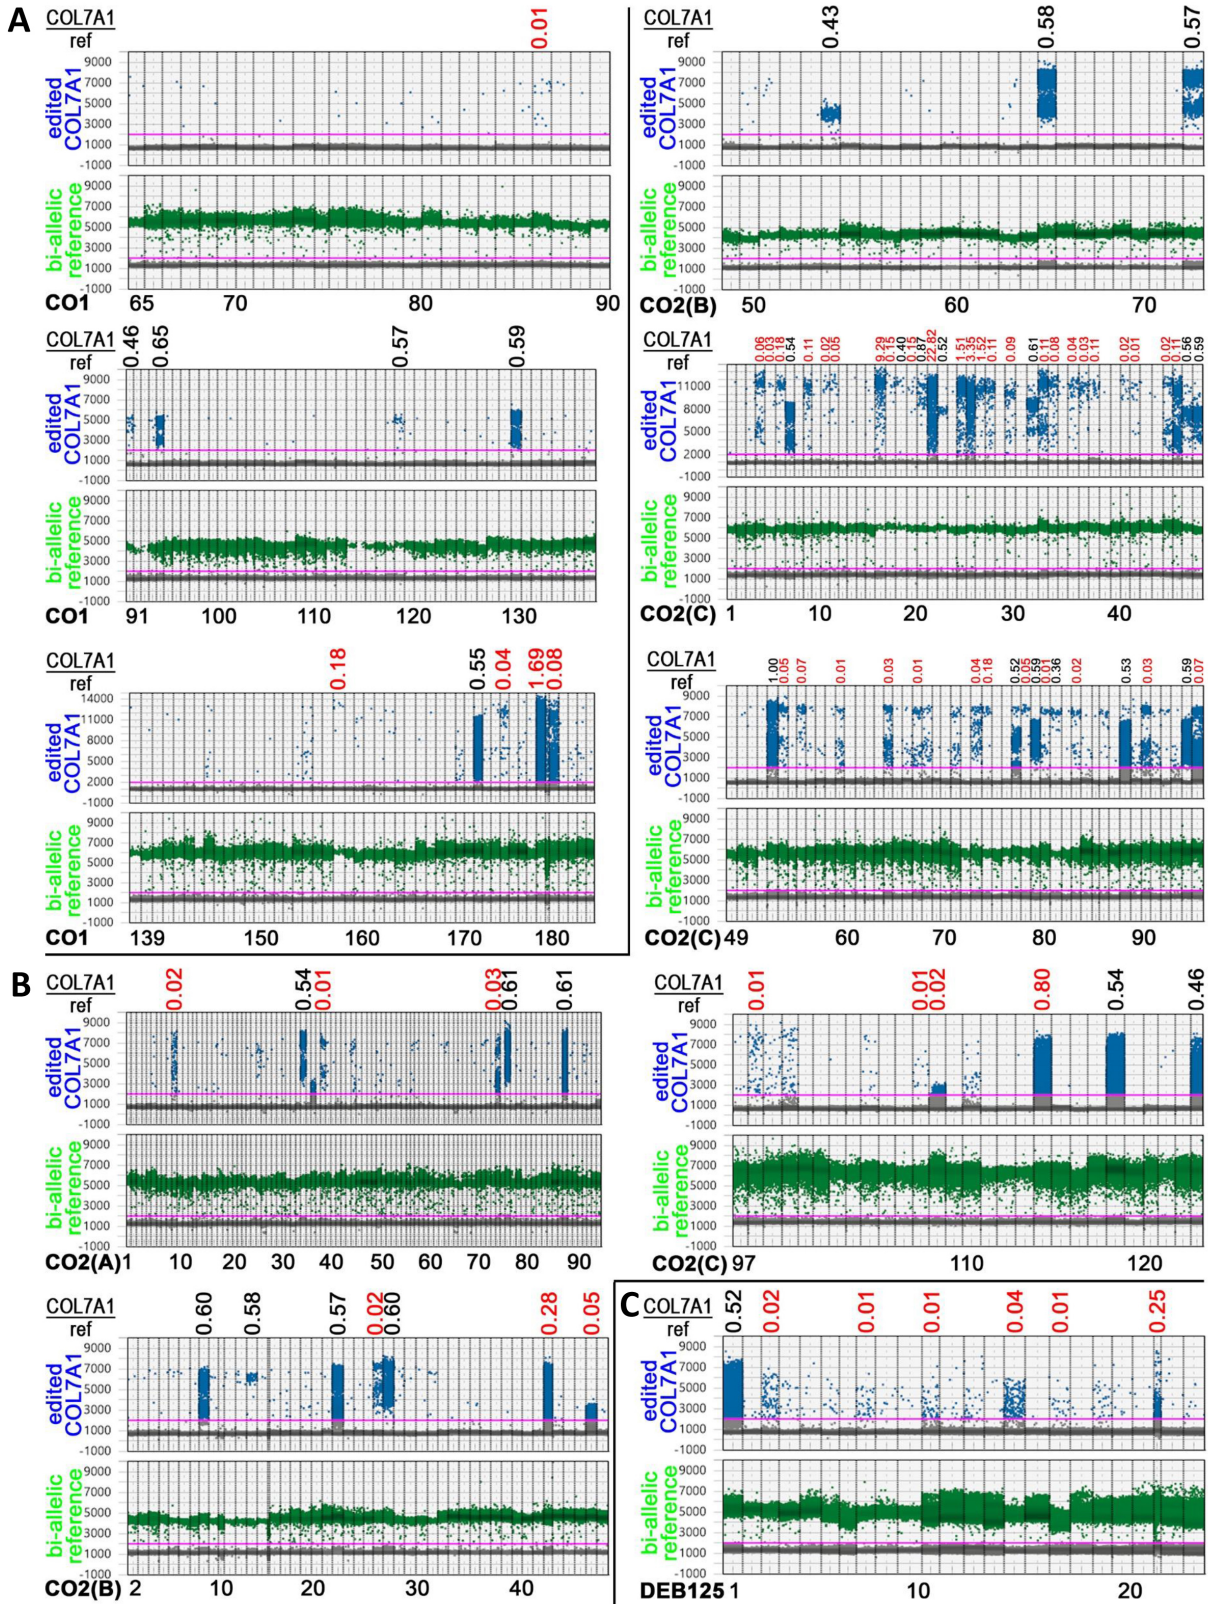

62 **Supplementary Figure 4: ddPCR screening of single-step edited/reprogrammed iPS cells.**  
63 **(A-C)** Screen of 122 (A), 293 (B), and 24 (C) single-step edited/reprogrammed iPS cell lines via  
64 ddPCR from patients as indicated. Ratios of signals detecting edited *COL7A1* alleles (blue) and  
65 a bi-allelic reference locus (green) are used to identify mono-allelic ( $0.5 \pm 0.19$ ) or bi-allelic ( $1.0$   
66  $\pm 0.19$ ) editing events (black values; red values below/above cut off indicate potentially mixed or  
67 incorrectly edited clones).  
68



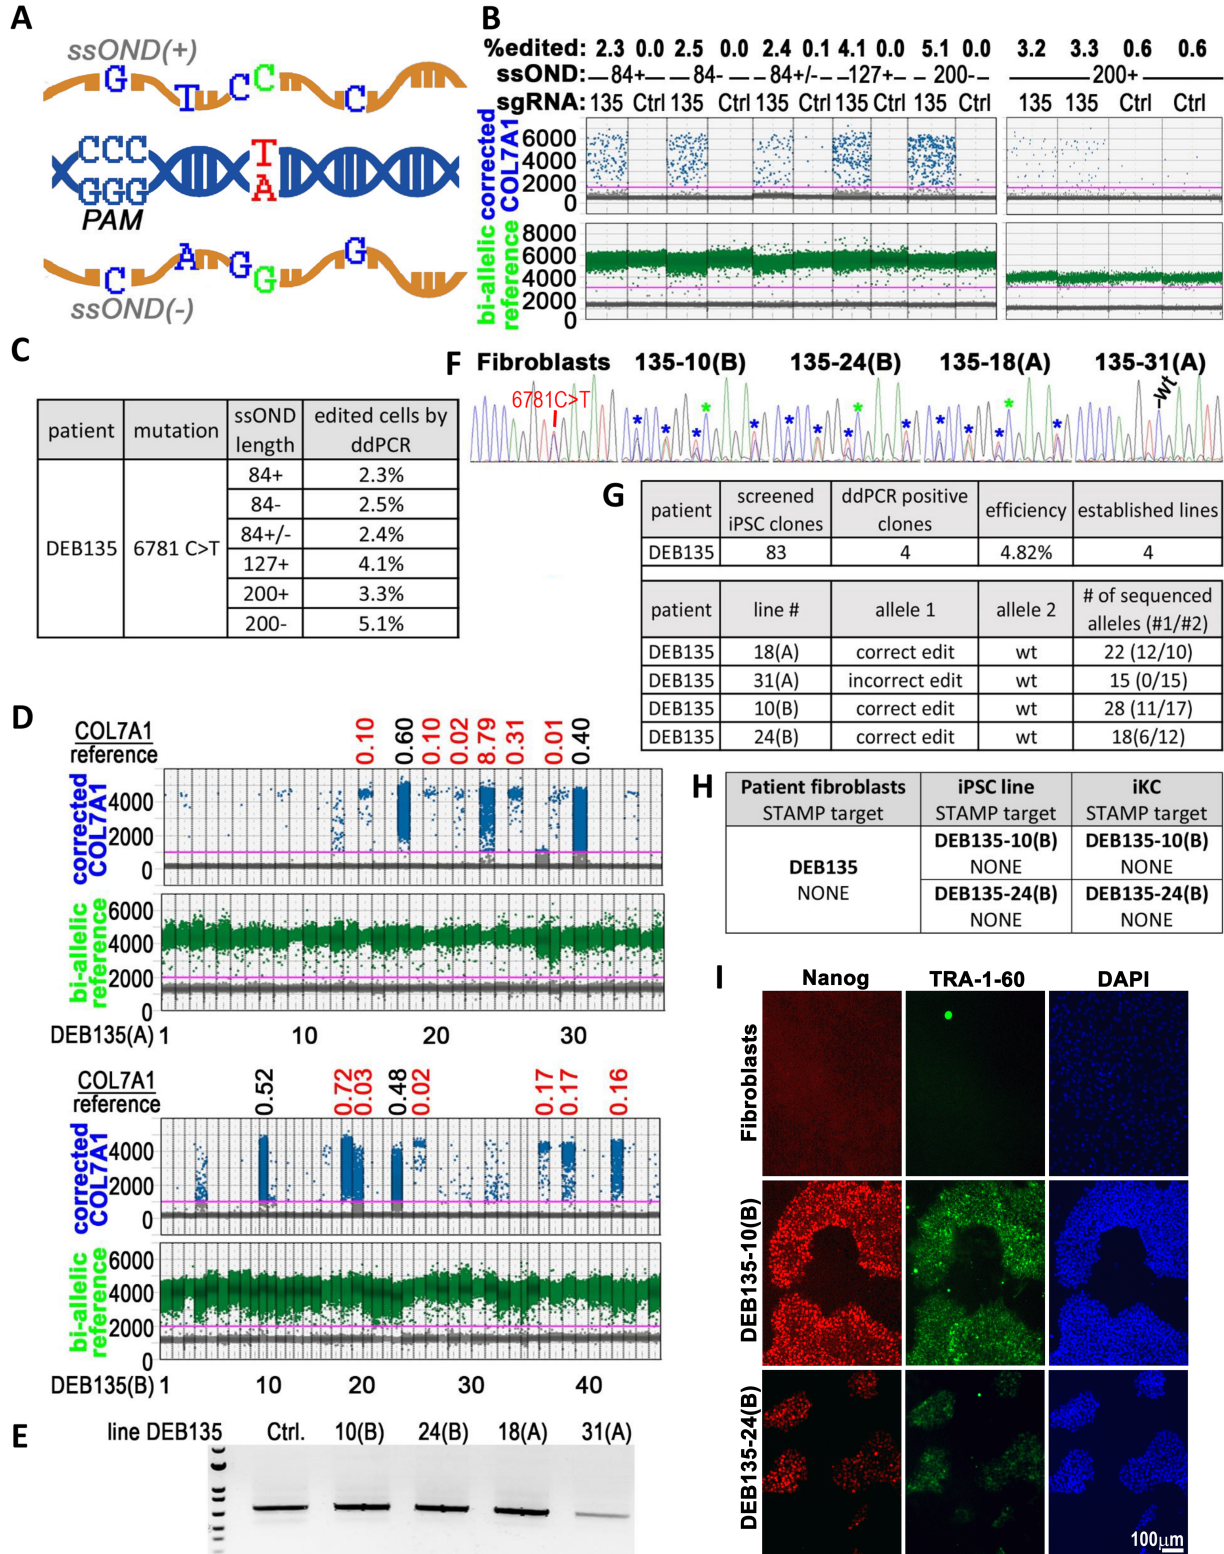

69

70 **Supplementary Figure 5: Optimized single manufacturing step editing/reprogramming of**

71 **patient DEB135 (6781C>T). (A) Overview of the COL7A1 target mutation 6781 C>T (red) and**

72 ssODNs used for editing. PAM site to mediate cutting of the pathogenic allele via CRISPR/CAS9  
73 is shown. ssODNs: wild type sequence (green); 4 silent mutations used for detection of editing  
74 events (blue). **(B-C)** *COL7A1* 6781C>T editing efficiencies as measured by ddPCR in DEB135  
75 primary patient fibroblasts after transfection with ssODNs of various lengths, orientation (+/-), and  
76 sgRNA 135/CAS9-containing RNPs as indicated. A bi-allelic locus (green) is used as a reference  
77 for calculating *COL7A1* editing (blue) efficiencies, assuming mono-allelic integration of donor  
78 sequence. The length of ssODNs correlates with editing efficiencies. Ctrl. omitted sgRNAs. **(D)**  
79 Screen of 83 iPS cell lines via ddPCR after single-step editing/reprogramming of fibroblasts from  
80 patient DEB135 with ssODN(-) and sgRNA 135. Ratios of signals detecting edited *COL7A1* alleles  
81 (blue) and a bi-allelic reference locus (green) are used to identify mono-allelic (0.5 +/-0.19) or bi-  
82 allelic (1.0 +/-0.19) edited iPS cell lines (black values; red values below/above cut off indicate  
83 potentially mixed or incorrectly edited clones). **(E)** Agarose gel visualizing PCR amplicons of a  
84 696bp sequence surrounding the edited *COL7A1* locus from established iPS cell lines from  
85 Supplementary Figure 5D. Unedited fibroblasts were used as Ctrl. DNA size reference in most  
86 left lane. **(F)** Sanger sequencing traces of PCR amplicons shown in Supplementary Figure 5E  
87 containing both *COL7A1* alleles. Unedited fibroblasts show the heterozygous 6781C>T mutation  
88 as a double peak. Correctly edited iPS cell lines show heterozygous integration of intended silent  
89 mutations (blue asterisks) and repair of the pathogenic mutation (green asterisks). iPS cell line  
90 135-31(A) only displayed the wild type sequence, indicative of a large InDel prohibiting  
91 amplification of the target allele. **(G)** Summary of single-step editing/reprogramming screen of  
92 patient DEB135 (top). Sanger sequencing of individual Topo-cloned alleles (Supplementary  
93 Figure 5E) confirmed correct editing in 3 iPS cell lines. See text for details. **(H)** STAMPv2  
94 oncopanel sequencing of indicated cell lines did not identify any variants. **(I)** Immuno-fluorescence  
95 microscopy images of DEB135 fibroblasts and thereof derived iPS cells. NANOG (red), TRA-1-  
96 60 (green), and DNA (blue). Scale as indicated.  
97

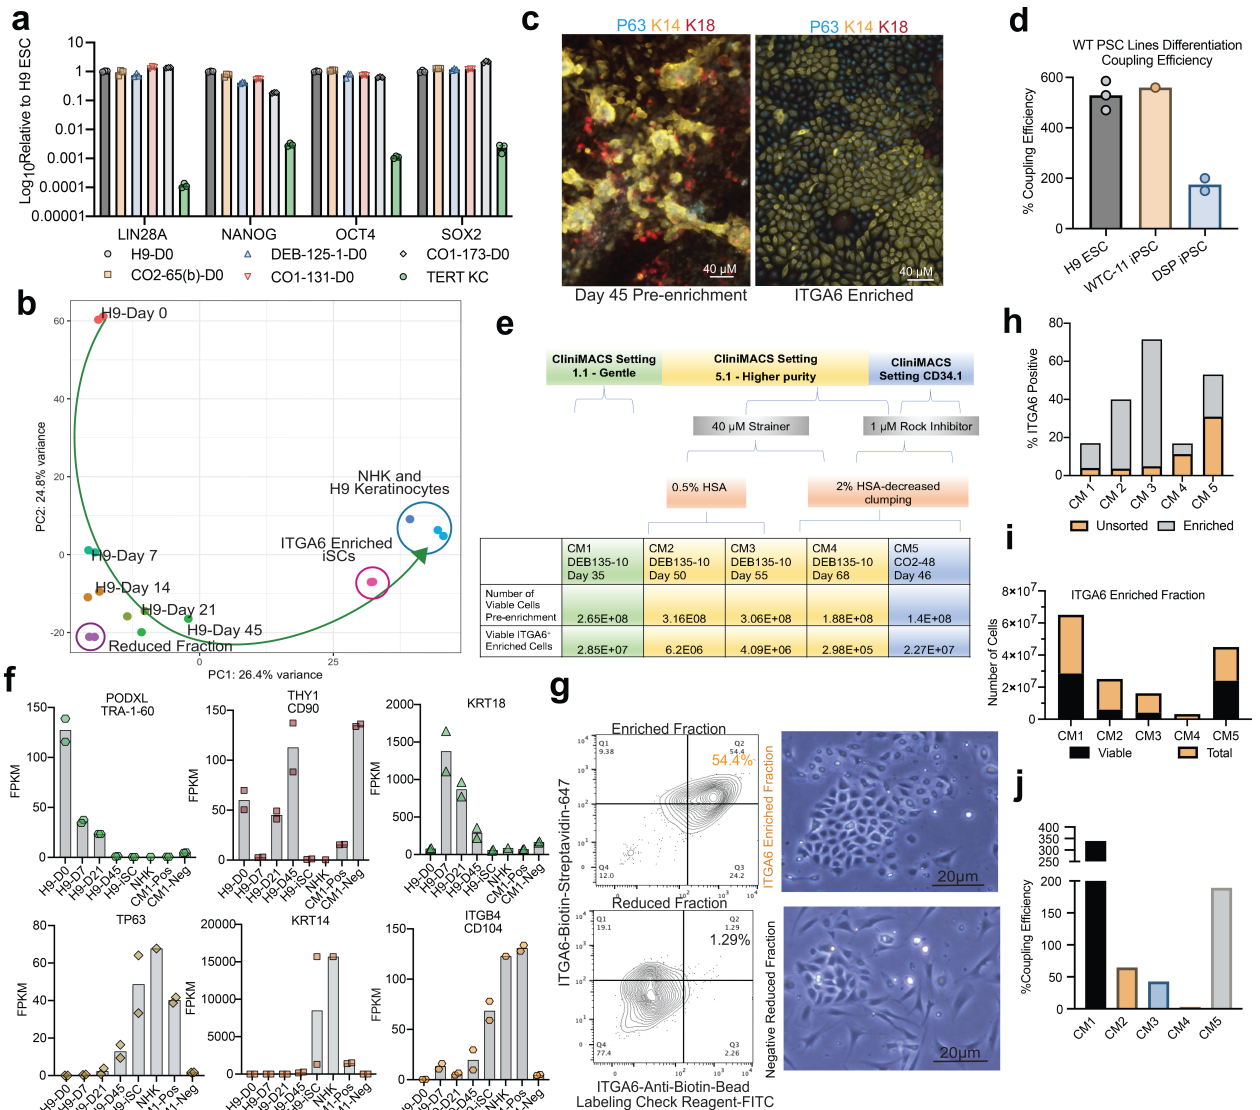

98

99

**Supplementary Figure 6: iSCs enrichment for clinical scale manufacturing. (A)** qRT-PCR of

100

pluripotency marker expression of iPS and ES cell lines. TERT keratinocytes (KC) were used as

101

the negative control (n= 3 technical replicates; mean and SEM are shown). Note log scale. **(B)**

102

Principal component analysis (PCA) of RNA-seq from CliniMACS Plus ITGA6-enriched and

103

reduced iSC cells compared to a H9-ES cells differentiation time course (D0-D45); H9

104

keratinocytes (KC) n = 2 biologically independent samples, and NHK (positive control, n=1), n = 2

105

for CliniMACS (CM) positive and negative samples. **(C)** Immunofluorescent images of

106

AutoMACS-ITGA6 enriched (and pre-enriched, left), DEB135-10 iSCs; p63 (Cyan), K18 (red),

107 and K14 (yellow). **(D)** % Coupling efficiency (CE) of H9 ES- and iPS cell- derived iSCs determined  
108 by the equation (6) %CE= live sorted iSCs/iPS cell input x 100. Note line-to-line variability between  
109 used iPS cells, both without genetic pathogenicity (see text for details). H9 n=3 independent  
110 biological replicates, WTC-11 n=1 and, DSP n=2. **(E)** Table of optimizations for 5 CliniMACS Plus-  
111 mediated ITGA6 enrichments, including program and reagent modifications for each run with pre-  
112 and post-enrichment cell counts. **(F)** Expression of CliniMACS Plus ITGA6-enriched and reduced  
113 populations analyzed via RNAseq, compared to H9 differentiation time course, H9 iSCs, and  
114 NHKs, illustrating the non-target population markers (TRA-1-60, Thy1/CD90, KRT18) and the  
115 target population markers (p63, KRT14 and ITGB4). **(G)** Flow cytometry plots and corresponding  
116 bright field images of ITGA6 enriched and reduced Fractions from CM3 CliniMACS Plus  
117 separation (10x Magnification, scale as indicated). **(H)** Flow cytometry analysis for % ITGA6  
118 positive cells of CM-sorted populations compared to the unsorted (pre-enriched) population. **(I)**  
119 Number of both viable and non-viable CliniMACS Plus-enriched iSCs. **(J)** %Coupling efficiency  
120 (CE) for CliniMACS Plus runs CM 1-5.  
121

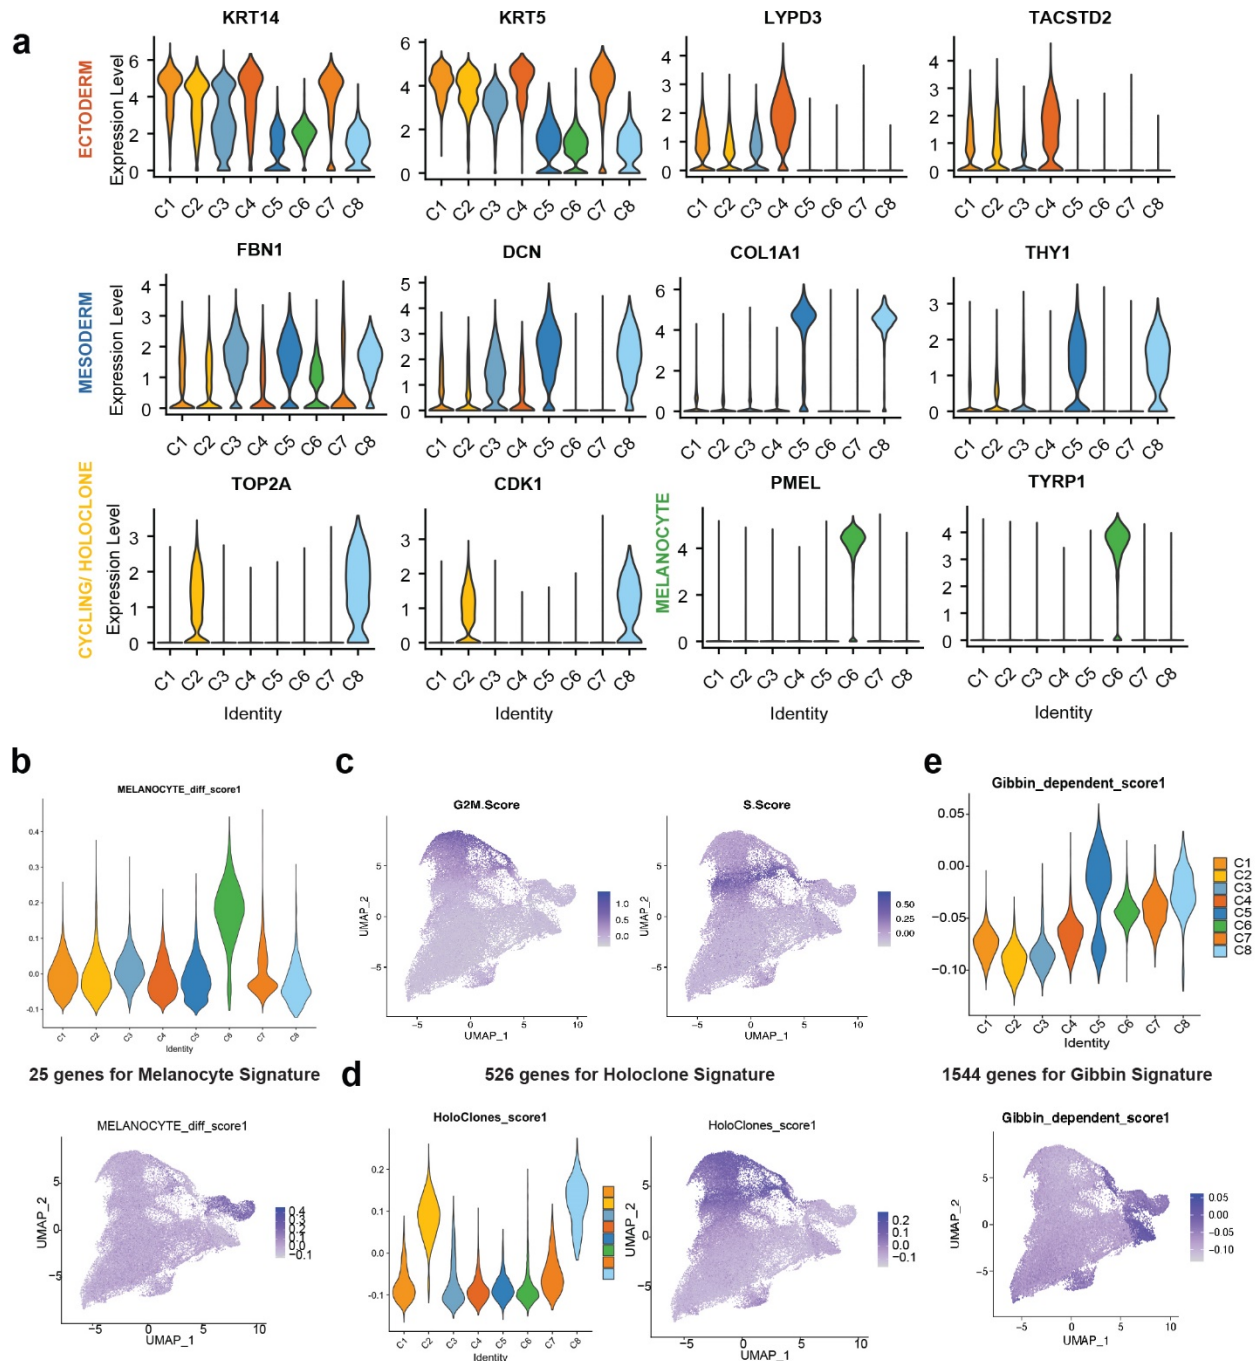

122

123 **Supplementary Figure 7: Analysis of iSC populations using scRNA-seq and canonical**  
 124 **markers. (A)** Violin plots of relative expression levels of indicated genes, i.e. markers for basal  
 125 keratinocytes (C1), cycling holoclones (C2), early differentiating keratinocytes (C4), mesoderm  
 126 (C5, C8), pre-vascular mesoderm (C3), and melanocytes (C6), define each cell cluster contained

127 in the iSC product (see also Figure 3). **(B)** Violin plot and Uniform manifold approximation  
128 projection (UMAP) illustrate the melanocyte population identified by a signature of 25 genes  
129 expressed in the C6 cluster. **(C)** UMAP illustrates clusters of cycling cells (i.e. C2 and C8) via  
130 G2/M and S phase expressed gene sets. **(D)** Violin and UMAP plots show the overlap of cycling  
131 cells with the keratinocyte stem cell/holoclone-like population (C2) using an enrichment score  
132 based on a 526 gene set. **(E)** A signature of 1544 genes defining the Gibbin-dependent mesoderm  
133 is expressed in the C5/C8 clusters, as shown by violin and UMAP plots. See material and methods  
134 and Supplementary Data 1 for references and used gene-expression sets.  
135

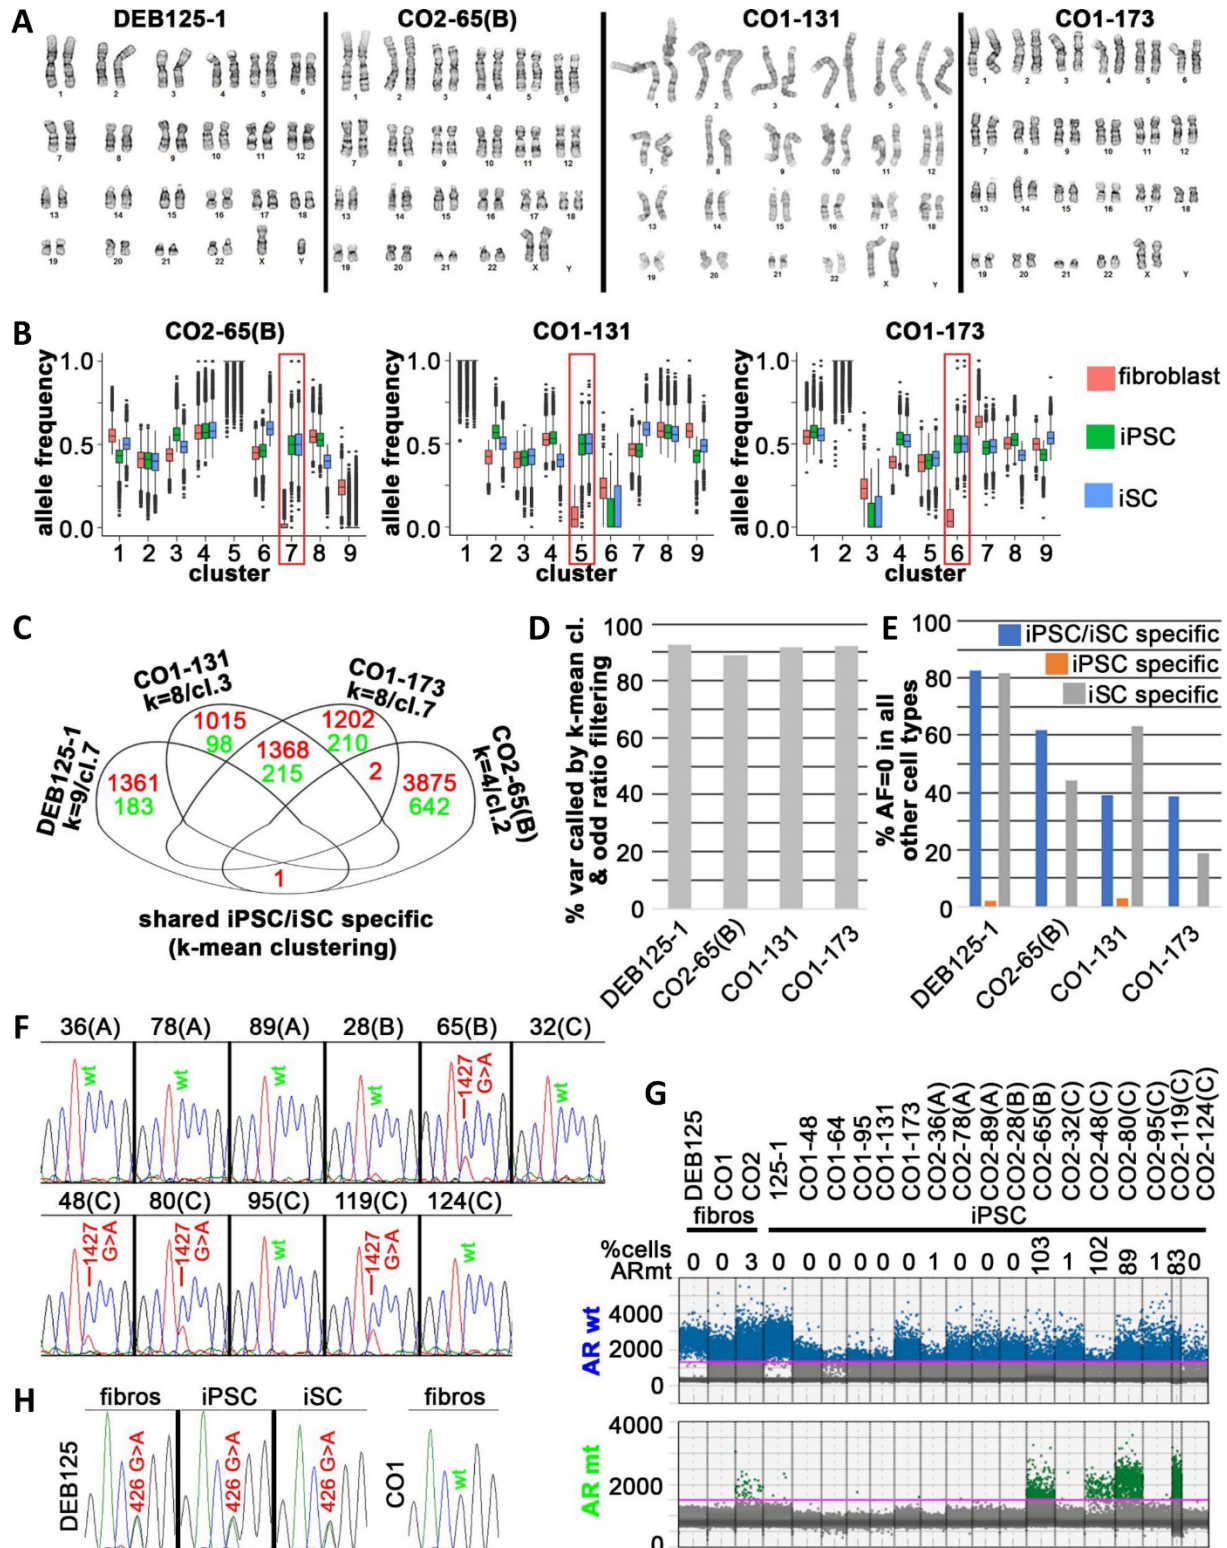

136

137

138

**Supplementary Figure 8: Genomic and chromosomal stability of single step edited/reprogrammed iPS cells and iSCs. (A)** Representative normal karyotypes of four single-

139 step edited/reprogrammed iPS cell lines from 3 individuals. **(B)** K-means clustering of all variants  
140 found by 40x whole genome sequencing (WGS) in fibroblasts and thereof derived iPS and iSC  
141 cells from patients CO1 and CO2 (CO2-65(B) n=114594; CO1-131 n=102278; CO1-173  
142 n=101915; see Supplementary Data 2). The red frame highlights differentially expressed allele  
143 frequencies (AFs) of variants in iPS/iSC cells compared to parental fibroblasts. Box plot shows  
144 interquartile ranges of data (25%-75%, boxes), with medians (center lines) and whiskers  
145 extending to 1.5 times the interquartile range; outliers as circles. **(C)** Variants (red: SNPs; green:  
146 InDels) that are specifically found in iPS and iSC cells of indicated cell lines as identified by k-  
147 means clustering. Grouping of variants in Venn diagrams indicates virtually no selection for  
148 mutations. Variants of clusters (cl.) showing clear separation between AFs found in fibroblasts  
149 and AFs found in iPS/iSC cells from feature spaces with the lowest k (indicated) were selected  
150 for this analysis. **(D)** AF cut-off filtering and k-means clustering identify virtually the same (>89%)  
151 variants specific to iPS/iSC cells. **(E)** Percentage of identified cell type-specific variants with no  
152 reads in other cell types as indicated. Note that virtually all iPS cell-specific variants identified by  
153 AF cut-off filtering (Figure 4C) were also found at lower AFs in other cell types. **(F)** Sanger  
154 sequencing traces of a PCR amplicon containing the androgen receptor (*AR*) locus c.1427 from  
155 indicated iPS cell lines of patient CO2. A heterozygous mutation was found in 4 of 11 iPS cell  
156 lines (double peaks). **(G)** A competitive ddPCR assay with probes specific for the wt and mt *AR*  
157 sequence from indicated cell lines confirms that 4 lines derived from patient CO2 harbor the  
158 mutation. Note that ddPCR detects this mt*AR* also in CO2 fibroblasts at low frequencies. **(H)**  
159 Sanger sequencing traces of a PCR amplicon containing the *CDKN1B* locus c.426 confirm a  
160 heterozygous germline mt (double peak) present in fibroblasts and thereof derived iPS/iSC cells  
161 of patient DEB125. Fibroblasts of patient CO1 were used as a negative control.

162



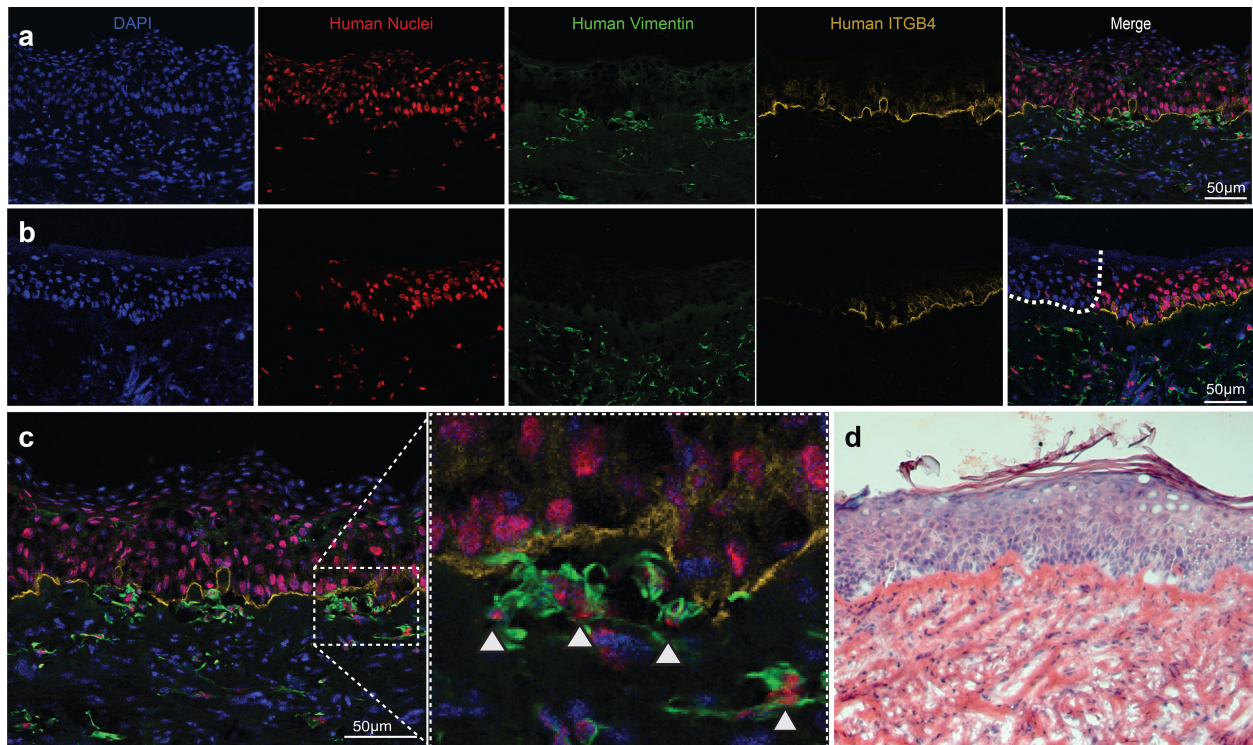

163

164 **Supplementary Figure 9: Human fibroblasts in the dermal layer of iSCs grafted onto mice.**165 **(A)** Immunofluorescence staining of iSC graft sites positive for human specific markers, i.e.

166 human nuclei (red), human vimentin (green) and human ITGB4 (yellow). DAPI (blue); Scale as

167 indicated. **(B)** Immunofluorescence staining as in (A) from graft border depicted by the dotted line

168 in the merged image. Note mouse cells (negative for above human-specific markers) infiltrating

169 the edge of graft. **(C)** Increased magnification of immunofluorescence staining from (A), merged

170 image, demonstrates that the mesoderm marker vimentin (green) is specific to the human nuclei

171 stain (red), as highlighted by white arrows. **(D)** Corresponding H&E histology of graft site

172 displaying the dermis and stratified epidermis.

173

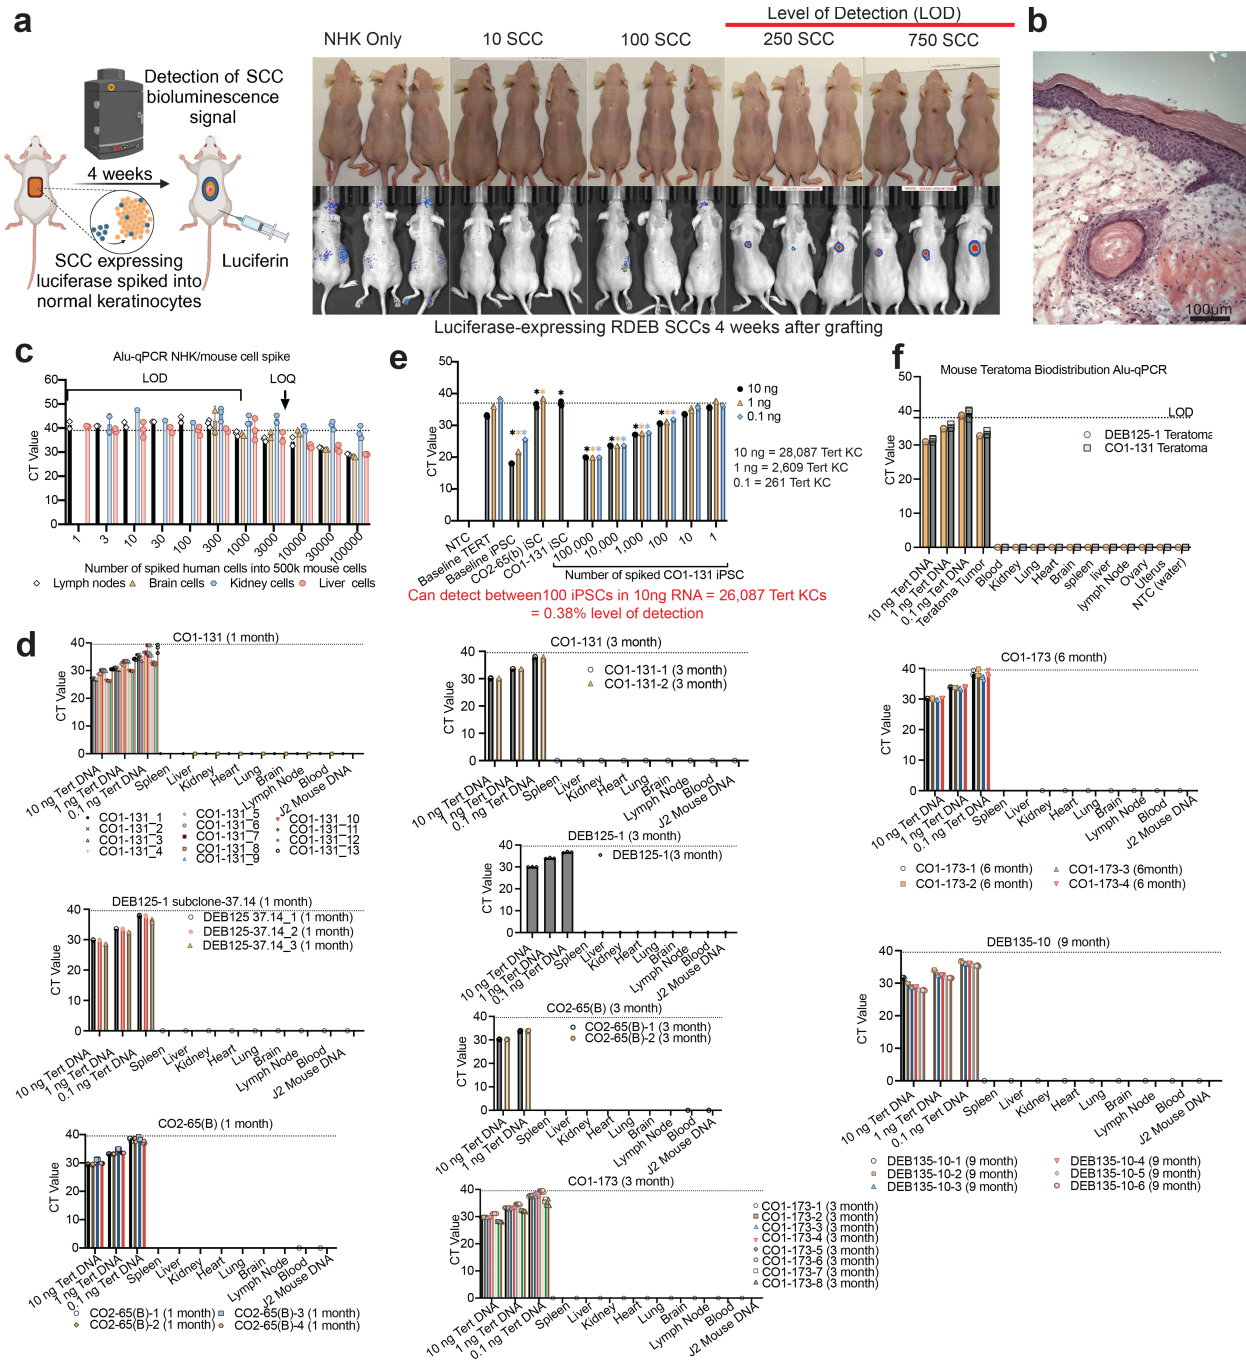

174

175 **Supplementary Figure 10: Biodistribution and tumorigenicity. (A)** Schematic of the  
 176 bioluminescent assay to detect luciferase expressing RDEB-squamous cell carcinoma (SCC)-  
 177 cells in iSC grafts at 4-weeks. Bioluminescent detection of NHKs and 10, 100, 250 and 750 RDEB  
 178 patient-derived SCC cells in 4-week-old grafts on mice determines a level of detection (LOD) as  
 179 indicated. **(B)** Histology (H&E stain) of graft site from positive sample from (A). **(C)** Alu-qPCR

180 detecting TERT-human keratinocytes in mouse cells as indicated to determine the level of  
181 detection (LOD) and quantification (LOQ) for human DNA (n=3 technical replicates; mean with  
182 SD). **(D)** Alu-qPCR experiments performed on organs and blood of iSC grafted mice at 1-9 months  
183 as indicated. At the left of each graph are the positive controls. Tissue sampled as indicated on  
184 the x axis (n=3 technical replicates; mean and SEM). **(E)** qRT-PCR of *LIN28A* to detect remnant  
185 iPS cells in expanded ITGA6-enriched iSC cultures. LOD was determined via spike in  
186 experiments as indicated; (n=3 technical replicates; mean and SD; Student's t test was used to  
187 determine the significance of differences with the annotations: \*  $p < 0.05$ ). **(F)** Mouse teratoma  
188 biodistribution assay with indicated iPS cell lines. Human specific Alu-qPCR did not detect any  
189 metastasizing cells. Human TERT keratinocytes and dissected iPS cell-induced teratomas were  
190 used as positive controls. Sampled tissues as indicated (n=3 technical replicates; mean and SEM;  
191 LOD: level of detection). Supplementary Figure 10/panel (a) created with BioRender.com  
192 released under a Creative Commons Attribution-NonCommercial-NoDerivs 4.0 International  
193 license.

194

### 195 **Supplementary Data 1**

196 Lists of used gene expression sets to define Gibbin-dependent mesoderm-like, holoclone-like and  
197 melanocyte-like cell clusters contained in the iSCs (also see Figure 3, Supplementary Figure 7).

### 198 **Supplementary Data 2**

199 List of variants represented by k-means clustering (see Figure 4B and Supplementary Figure 8B).

### 200 **Supplementary Data 3**

201 Plots of whole genome sequencing coverage 1kbp and 1Mbp up-/downstream of *57 in silico*

202 predicted exonic, intronic, and intergenic off-targets for sgRNA C4 from fibroblasts and thereof  
 203 derived iPS cells and iSCs.

204 **Supplementary Table 1**

| target                                                                      | primer 1                  | primer 2                    | size   |
|-----------------------------------------------------------------------------|---------------------------|-----------------------------|--------|
| Colorado mt allele (Figures 1C-D, 2D, 4E&G; Supplementary Figures 1B-D, 2B) | TAGGTGGGACAAGTGCTGCTGACTC | CCTTTAGTCCTGCACTCCCAACATCAC | 731bp  |
| Colorado mt allele big (Figure 2E)                                          | TCATGTCTGAGCTCCTGTGAGCC   | TCCACAGACTGGCTCATTTCTCACC   | 2418bp |
| Colorado/Mexico mt allele (Supplementary Figure 2C)                         | GCGTGGTATGGCTGGGCCTGAAG   | CCTTTAGTCCTGCACTCCCAACATCAC | 4560bp |
| DEB135 allele (Supplementary Figure 5E&F)                                   | CTGACTGGACCTACTGGAGCTGTG  | CCTGTGGGAATGCTAGTGAGTTTCC   | 696bp  |
| E. coli colony PCR (Figure 1F; Supplementary Figure 1F-H)                   | GGACAAGTGCTGCTGACTCT      | CACCGTGAGCCCCCTT            | 327bp  |
| AR (Supplementary Figure 8F)                                                | CTCGCATCAAGCTGGAGAAC      | ACACATCAGGTGCGGTGAAG        | 354bp  |
| CDKN1B (Supplementary Figure 8H)                                            | CTTGAGAAGCACTGCAGAGAC     | CGAAAAGCAAGCTAAGGTTAACACC   | 426bp  |
| <i>in silico</i> predicted off-targets (Figure 4E&G)                        | primer 1                  | primer 2                    | size   |
| NOTCH1                                                                      | GTGTGACGCAGCCTGTGGGTGC    | AAGCGCACCAAGTTCTTCAGGACAGAC | 648bp  |
| AC144450.2                                                                  | GAGCTTGCACTGAGCAGAGATCG   | CCTCTCCCTGACTTCTTACACTG     | 727bp  |
| PAK4                                                                        | CAGAGAAGAGGCCCAAGTCTTCC   | GCACCTCGTTGAAGAGCAGCTC      | 835bp  |
| CAPN12                                                                      | GCATTGAGTTCTTCTCCTAGTCC   | GTAATTTGCAGGGAGATCGACGAC    | 702bp  |
| FXYD1/CTD-2527121.4                                                         | GAGGAAACTAAGGCACAGGGAGG   | CCTTCAACTCTGGCACTTGGCC      | 763bp  |
| HS3ST4                                                                      | CGTGACCAGGGCCATCTCTG      | CCAGATGCTGCTGCCAGATGG       | 723bp  |
| MARS                                                                        | GGAATAGGGCAGAGCCTTGGG     | GAGATCAGCAAACGGGACCTAGC     | 357bp  |
| PAQR7/RP1-125I3.2                                                           | CCCACATAGTCCAGGAAGAAGAAGC | CCTCTCATGTGTTTACATGGCCAG    | 829bp  |
| RP11-334A14.8/SLC1A7                                                        | CTGGGCTTTCTGCCTACCAGTG    | CCATTTCTCTGGCTGCACAATCC     | 773bp  |
| RP5-1159O4.1/MIOS                                                           | CGACAGAGTGGTCTGAGAAGC     | GGGTACAACGGGAACAGGGCA       | 746bp  |
| SLC25A29                                                                    | AGCACTGGTGTCCCATCTGCAG    | GTTTGTACTCAGCAGATGCCAGCTG   | 751BP  |
| UBE2I                                                                       | CAGTCCCTCACACACACAC       | AGGTCTGGGAATCTGCTTT         | 719BP  |
| ZNF385A                                                                     | GCATCCTAGTTTCCAGCTTCGTCC  | CCCAGAAGGATGTCGGAGTATC      | 767bp  |
| FAM207A                                                                     | CAGAGTCAAGGGTTAGAGG       | GACAGGCTTCTTCTCTGTGCCCT     | 705bp  |
| LINC00710                                                                   | CAGAGCAGCCAGTCCAAAGACC    | GGCCACACTGATAAGGTGGAGAC     | 776bp  |
| OLFM1                                                                       | CCATGGATCCCCTAATCCAAATGCC | TGAGAGGAACAACGCCTTCTCTGG    | 760bp  |
| PADI3                                                                       | CGTGATAAGAGTGCAGAGGCTGG   | GCAGCTCCCTCCACTCTTACAAG     | 825bp  |
| PLXNA1                                                                      | GTCATGGACTGCCCAACTCAGC    | GCACGGGTCTAGAATGTTCCACTG    | 714bp  |
| PRR26                                                                       | CGGAGATTCTAGCCCTTGTCCCTG  | CCAACACTGTGCGTGTGACTCAG     | 746bp  |
| RBM10                                                                       | CTGAGCTCAAGCAGTCCACAG     | CCATTTACTCGGCAGGACAGTC      | 558bp  |
| TIMM44                                                                      | CAGCCTCCTCAGAAAACAGCCTCG  | GTCCTGTGAGGACTGCTAGAGGC     | 741bp  |
| UST                                                                         | GTCCAGGGCACCTGTAAGTAAGCC  | GGGTGTCAATGCACGACATTCTCCC   | 766bp  |
| VWA3A                                                                       | TAGGCAGGAGGTCCCAAACAGC    | GCTAGTCCTTCTCAAGCCCCTTC     | 653bp  |
| VWF                                                                         | TAGTCACTGGCTGGCTGGGTGTG   | ACAGCATTCCTGGACTCTGCAGCC    | 709bp  |
| ZBED4                                                                       | GGCTCCTGTGGAATTTGTGGCAG   | GGGCCAGTGAGCAAAGTCGCATC     | 744bp  |
| ZNF534                                                                      | CTGAAATGCCAGGCATTGGAGTTGC | GCAGCAGATCACAGGTGTCTGAGC    | 868bp  |

205

206

207

208

209

210 **Source Data – uncropped gels:**

211

212 **Supplementary Figure 1B**

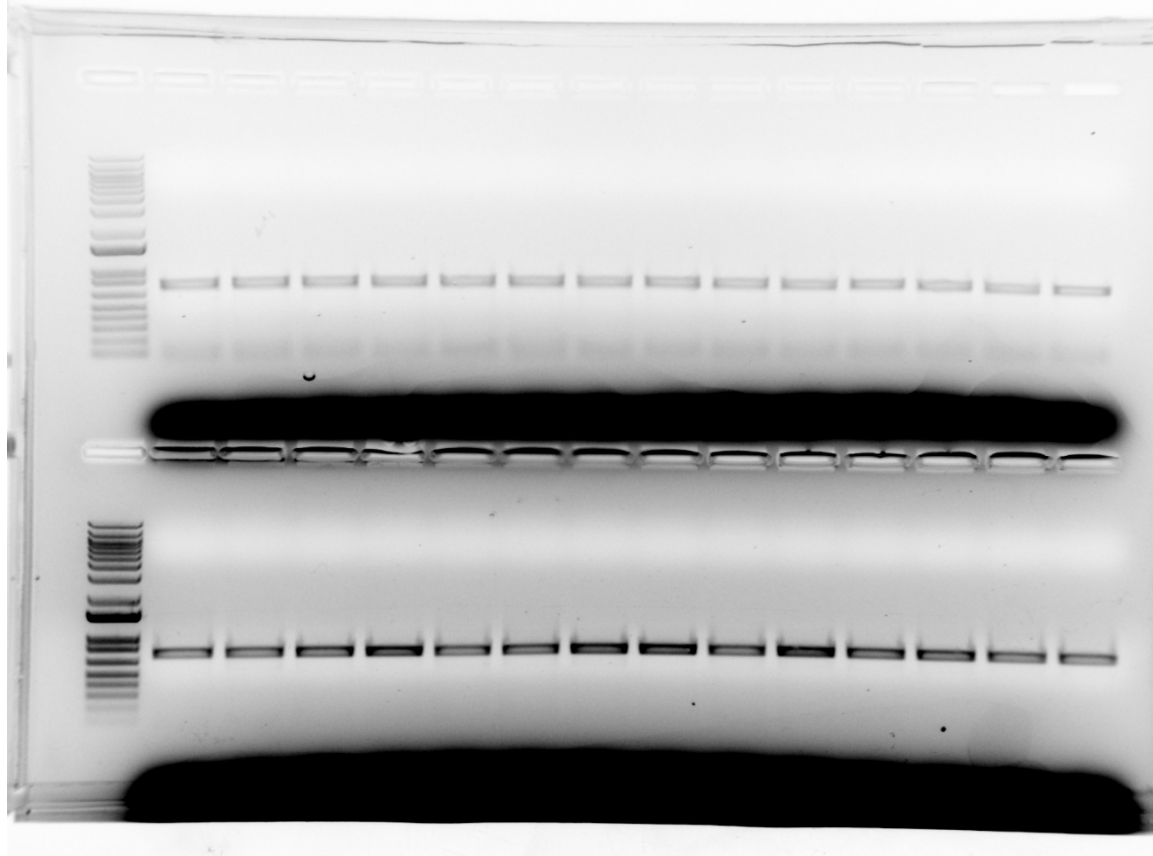

213

214

215

216

217

218

219

220

221

222

223

224

225

226

227

228

229

230

231

232

233

234 Supplementary Figure 1F

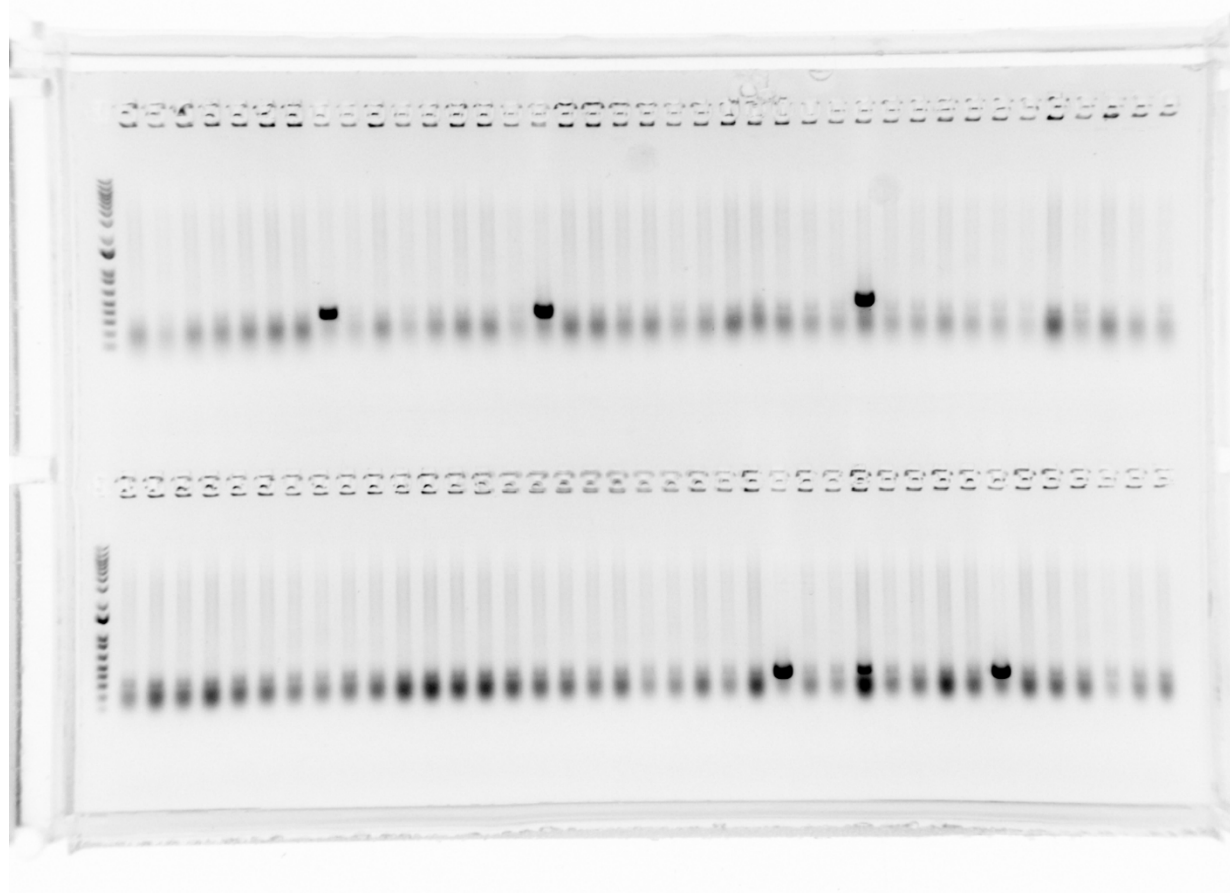

235  
236  
237  
238  
239  
240  
241  
242  
243  
244  
245  
246  
247  
248  
249  
250  
251  
252  
253  
254  
255

256 Supplementary Figure 1G

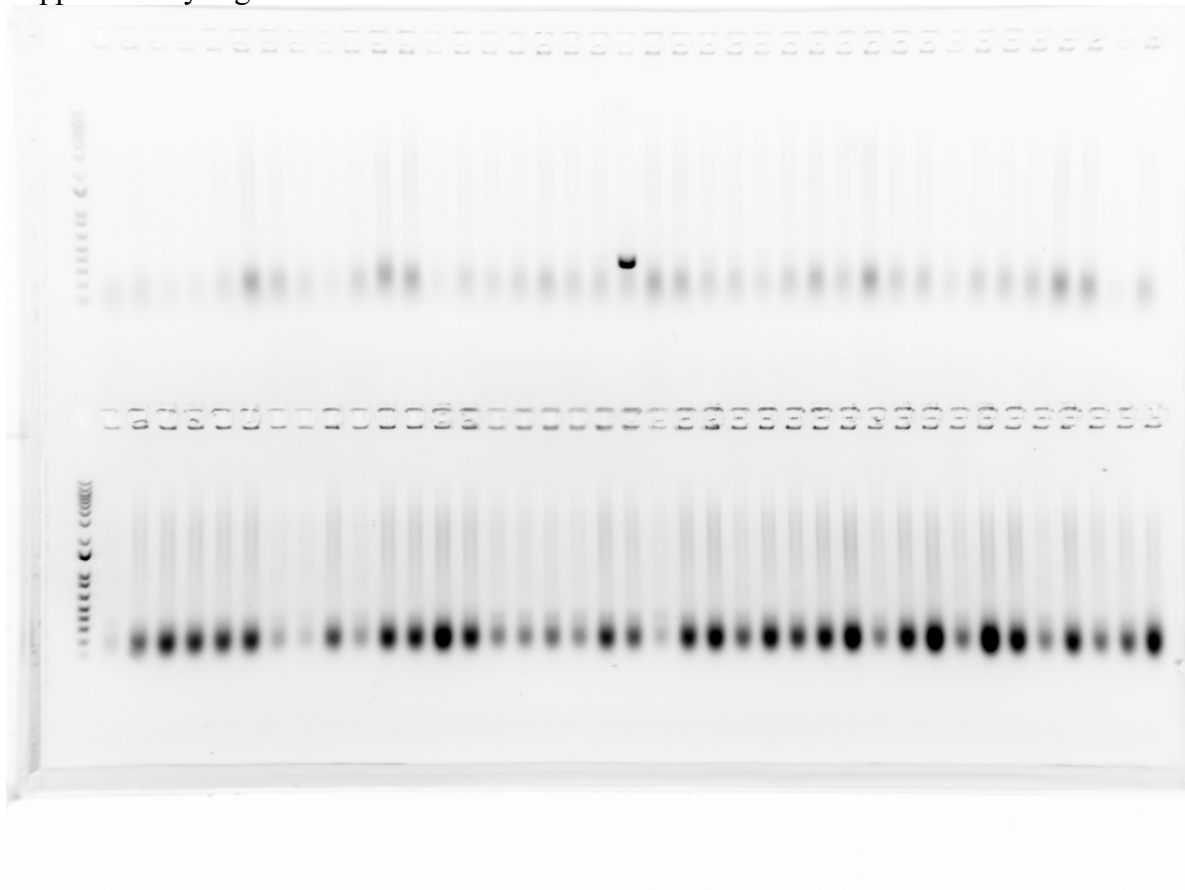

257  
258  
259  
260  
261  
262  
263  
264  
265  
266  
267  
268  
269  
270  
271  
272  
273  
274  
275  
276  
277  
278

279 Supplementary Figure 1H

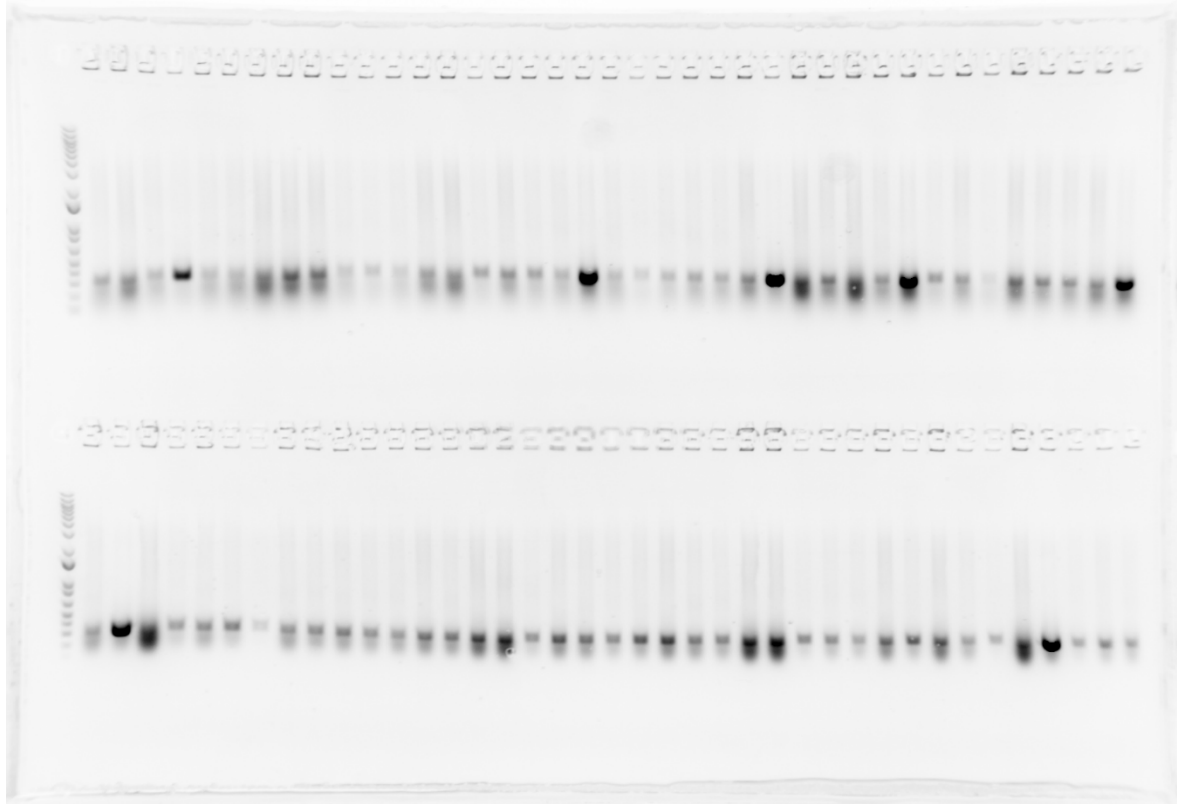

280  
281 Supplementary Figure 2B

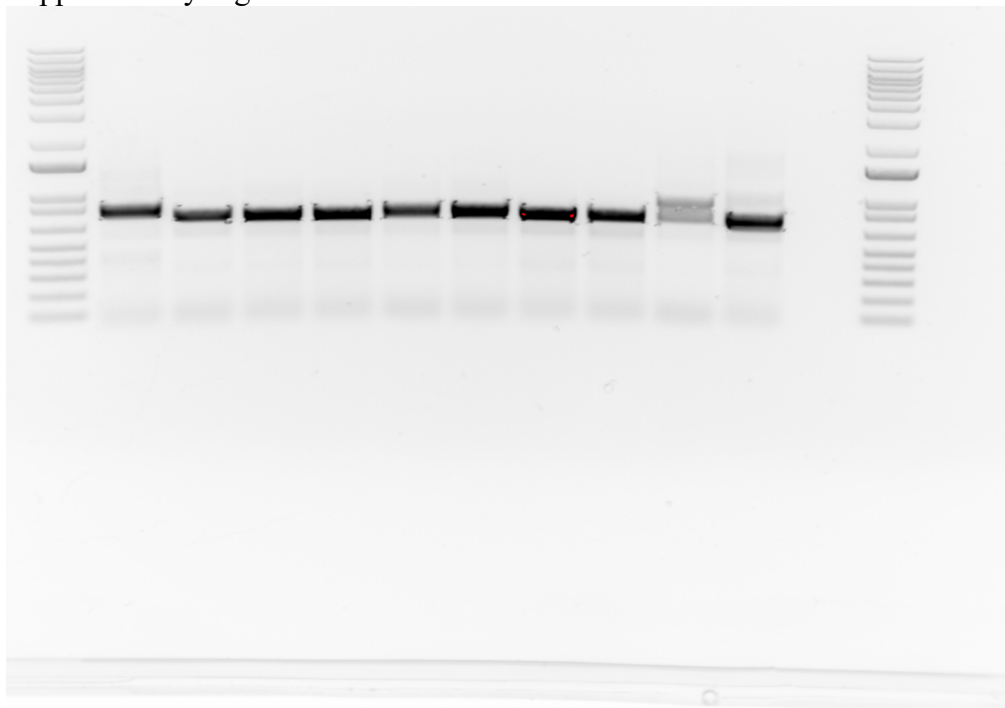

282



283 Supplementary Figure 2C

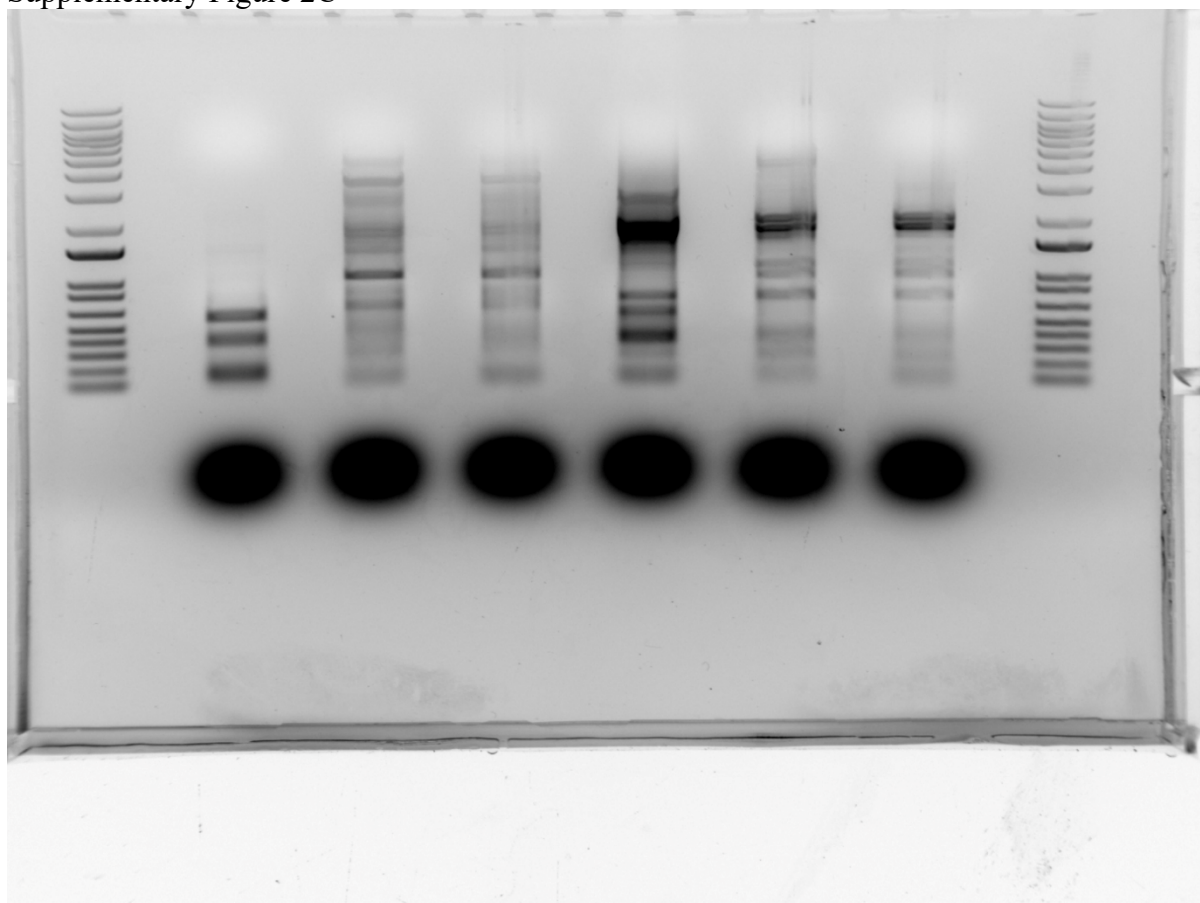

284  
285  
286  
287  
288  
289  
290  
291  
292  
293  
294  
295  
296  
297  
298  
299  
300  
301  
302  
303  
304  
305

306 Supplementary Figure 5E

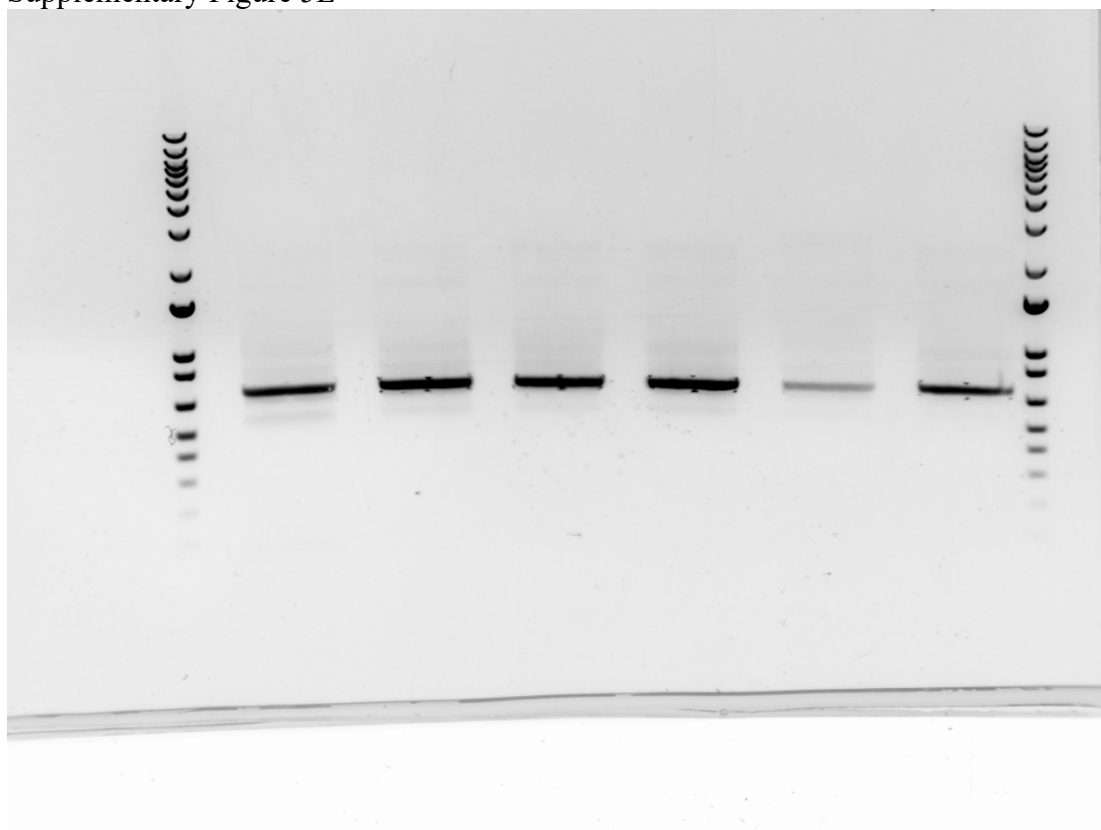

307
