# Supplementary material for: A scalable and cGMP-compatible autologous organotypic cell therapy for Dystrophic Epidermolysis Bullosa
Source: PubMed Central journal article supplement (PMC11239819; doi:10.1038/s41467-024-49400-z), 2024-07-11
Supplement: 41467_2024_49400_MOESM3_ESM.pdf [file 41467_2024_49400_MOESM3_ESM.pdf]

## **Description of Additional Supplementary Files**

### **File Name: Supplementary Data 1**

**Description:** Lists of used gene expression sets to define Gibbin-dependent mesoderm-like, holoclone-like and melanocyte-like cell clusters contained in the iSCs (also see Figure 3, Supplementary Figure 7).

### **File Name: Supplementary Data 2**

**Description:** List of variants represented by k-means clustering (see Figure 4B and Supplementary Figure 8B).

### **File Name: Supplementary Data 3**

**Description:** Plots of whole genome sequencing coverage 1kbp and 1Mbp up-/downstream of 57 in silico predicted exonic, intronic, and intergenic off-targets for sgRNA C4 from fibroblasts and thereof derived iPS cells and iSCs.
